# Supplementary material for: Solvothermal synthesis and excellent electrochemical performance of polycrystalline rose-like Co9S8 hierarchical architectures
Source: Royal Society of Chemistry journal article supplement (doi:10.1039/c3ta10895c), 2013-01-01
Supplement: c3ta10895c.pdf [file c3ta10895c.pdf]

## Solvothermal synthesis and excellent electrochemical performance of polycrystalline rose-like $\text{Co}_9\text{S}_8$ hierarchitectures

Rencheng Jin,<sup>a\*</sup> Junshen Liu,<sup>a</sup> Yanbin Xu,<sup>a</sup> Guihua Li,<sup>a</sup> Gang Chen<sup>b</sup>

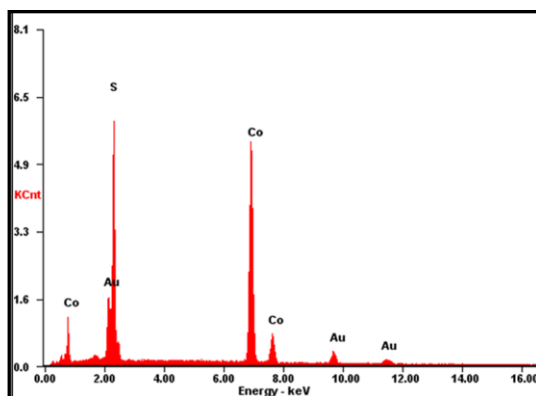

Fig. S1 Energy dispersive spectrum of the as-synthesized rose-like  $\text{Co}_9\text{S}_8$ .

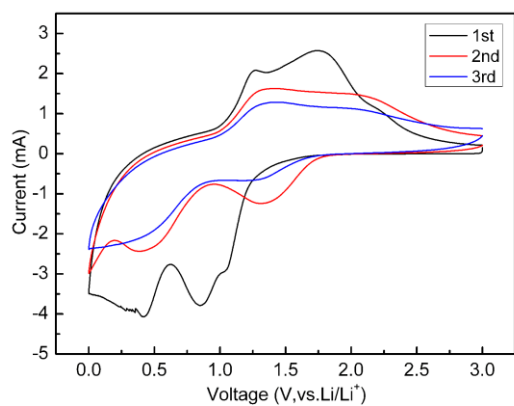

Fig. S2 CV curve of the rose-like  $\text{Co}_9\text{S}_8$  electrode at  $0.5 \text{ mV s}^{-1}$  scanning rate in the potential window from 0.01 V to 3.0 V (vs. Li<sup>+</sup>/Li).
